# Supplementary material for: Epidemiology and Genetic Diversity of PCV2 Reveals That PCV2e Is an Emerging Genotype in Southern China: A Preliminary Study
Source: MDPI journal article supplement (doi:10.3390/v14040724), 2022-03-30
Supplement: s1 [file s1]

Supplementary Table S1. Specific primers used in this study

| Primer Name    | Sequence (5'-3')          | PCR product size (bp)   | References |
|----------------|---------------------------|-------------------------|------------|
| <i>S. suis</i> |                           |                         |            |
| 16S rRNA-F     | CAGTATTTACCGCATGGTAGATAT  | 319                     | [42]       |
| 16S rRNA-R     | GTAAGATACCGTCAAGTGAGAA    | (Detection of 16S rRNA) |            |
| recN-F         | CTACAAACAGCTCTCTTCT       | 336 (Detection of recN) |            |
| recN-R         | ACAACAGCCAATTCATGGCGTGATT |                         |            |
| PCV2           |                           |                         |            |
| PCV2-D-F       | AGAAGCTCTCTATCGGAG        | 569                     | [76]       |
| PCV2-D-R       | AAGGTTGAATTCTGGCCC        |                         |            |
| PCV2-C-F1      | TGGTGACCGTTGCAGAGCAG      | 1103                    |            |
| PCV2-C-R1      | TGGGCGGTGGACATGATGAG      |                         |            |
| PCV2-C-F2      | KGTATGGCGGGAGGAGTAG       | 1123                    |            |
| PCV2-C-R2      | AGGTGGTTTCCAGTATGTGG      |                         |            |
| PCV3           |                           |                         |            |
| PCV3-D-F       | TTACTTAGAGAACGGACTTGTAACG | 649                     | [77]       |
| PCV3-D-R       | AAATGAGACACAGAGCTATATTCAG |                         |            |
| CSFV           |                           |                         |            |
| CSFV-D-F       | TAGGGTGGACGGGTGTCATAGAGT  | 566                     | [76]       |
| CSFV-D-R       | AAGCATATATTGCTGGAAGTAGCT  |                         |            |
| PRRSV          |                           |                         |            |
| PRRSV-D-F      | GCCTCGTGTTGGGTGGCAGAA     | 532                     |            |
| PRRSV-D-R      | CGCCCTAATTGAATAGGTGACTT   |                         |            |
| PRV            |                           |                         |            |
| PRV-D-F        | GAAGGGGTTGGACAGGAAGGAC    | 194                     | [78]       |
| PRV-D-R        | ACCAGCCGCTCAAGTTCTACGA    |                         |            |
